# Supplementary material for: miR-155 in the progression of lung fibrosis in systemic sclerosis
Source: PubMed Central journal article supplement (PMC4932708; doi:10.1186/s13075-016-1054-6), 2016-07-05
Supplement: 13075_2016_1054_MOESM3_ESM.pdf [file 13075_2016_1054_MOESM3_ESM.pdf]

| #   | KEGG pathway                                                                    | p-value      | #genes                        | #miRNAs | details                 |
|-----|---------------------------------------------------------------------------------|--------------|-------------------------------|---------|-------------------------|
| 1.  | <a href="#">ECM-receptor interaction (hsa04512)</a>                             | <1e-16       | 16 <a href="#">see genes</a>  | 3       | <a href="#">details</a> |
| 2.  | <a href="#">Ubiquitin mediated proteolysis (hsa04120)</a>                       | <1e-16       | 76 <a href="#">see genes</a>  | 9       | <a href="#">details</a> |
| 3.  | <a href="#">Wnt signaling pathway (hsa04310)</a>                                | <1e-16       | 79 <a href="#">see genes</a>  | 10      | <a href="#">details</a> |
| 4.  | <a href="#">MAPK signaling pathway (hsa04010)</a>                               | <1e-16       | 132 <a href="#">see genes</a> | 13      | <a href="#">details</a> |
| 5.  | <a href="#">Pathways in cancer (hsa05200)</a>                                   | <1e-16       | 166 <a href="#">see genes</a> | 15      | <a href="#">details</a> |
| 6.  | <a href="#">Axon guidance (hsa04360)</a>                                        | 7.771561e-16 | 72 <a href="#">see genes</a>  | 11      | <a href="#">details</a> |
| 7.  | <a href="#">PI3K-Akt signaling pathway (hsa04151)</a>                           | 2.742251e-14 | 137 <a href="#">see genes</a> | 12      | <a href="#">details</a> |
| 8.  | <a href="#">TGF-beta signaling pathway (hsa04350)</a>                           | 5.884182e-14 | 41 <a href="#">see genes</a>  | 10      | <a href="#">details</a> |
| 9.  | <a href="#">ErbB signaling pathway (hsa04012)</a>                               | 1.172396e-13 | 40 <a href="#">see genes</a>  | 12      | <a href="#">details</a> |
| 10. | <a href="#">Transcriptional misregulation in cancer (hsa05202)</a>              | 1.231237e-13 | 83 <a href="#">see genes</a>  | 11      | <a href="#">details</a> |
| 11. | <a href="#">Lysine degradation (hsa00310)</a>                                   | 4.272138e-13 | 20 <a href="#">see genes</a>  | 12      | <a href="#">details</a> |
| 12. | <a href="#">Prostate cancer (hsa05215)</a>                                      | 9.174883e-13 | 46 <a href="#">see genes</a>  | 10      | <a href="#">details</a> |
| 13. | <a href="#">Focal adhesion (hsa04510)</a>                                       | 2.443379e-12 | 91 <a href="#">see genes</a>  | 11      | <a href="#">details</a> |
| 14. | <a href="#">Adherens junction (hsa04520)</a>                                    | 6.371126e-12 | 43 <a href="#">see genes</a>  | 9       | <a href="#">details</a> |
| 15. | <a href="#">Neurotrophin signaling pathway (hsa04722)</a>                       | 1.918438e-10 | 66 <a href="#">see genes</a>  | 13      | <a href="#">details</a> |
| 16. | <a href="#">Endocytosis (hsa04144)</a>                                          | 3.15572e-10  | 84 <a href="#">see genes</a>  | 9       | <a href="#">details</a> |
| 17. | <a href="#">Hepatitis B (hsa05161)</a>                                          | 5.804531e-10 | 62 <a href="#">see genes</a>  | 10      | <a href="#">details</a> |
| 18. | <a href="#">Regulation of actin cytoskeleton (hsa04810)</a>                     | 6.585752e-10 | 98 <a href="#">see genes</a>  | 10      | <a href="#">details</a> |
| 19. | <a href="#">Glycosaminoglycan biosynthesis - chondroitin sulfate (hsa00532)</a> | 2.725444e-09 | 7 <a href="#">see genes</a>   | 4       | <a href="#">details</a> |
| 20. | <a href="#">Colorectal cancer (hsa05210)</a>                                    | 7.339393e-09 | 34 <a href="#">see genes</a>  | 9       | <a href="#">details</a> |
| 21. | <a href="#">Renal cell carcinoma (hsa05211)</a>                                 | 5.928736e-08 | 39 <a href="#">see genes</a>  | 9       | <a href="#">details</a> |
| 22. | <a href="#">Chronic myeloid leukemia (hsa05220)</a>                             | 6.408452e-08 | 35 <a href="#">see genes</a>  | 6       | <a href="#">details</a> |
| 23. | <a href="#">HTLV-I infection (hsa05166)</a>                                     | 3.661482e-06 | 98 <a href="#">see genes</a>  | 7       | <a href="#">details</a> |
| 24. | <a href="#">Insulin signaling pathway (hsa04910)</a>                            | 0.0001957903 | 47 <a href="#">see genes</a>  | 7       | <a href="#">details</a> |
| 25. | <a href="#">Bacterial invasion of epithelial cells (hsa05100)</a>               | 0.0002452291 | 33 <a href="#">see genes</a>  | 7       | <a href="#">details</a> |

|     |                                                                       |              |    |                           |   |                         |
|-----|-----------------------------------------------------------------------|--------------|----|---------------------------|---|-------------------------|
| 25. | Bacterial invasion of epithelial cells (hsa05100)                     | 0.0002452291 | 33 | <a href="#">see genes</a> | 7 | <a href="#">details</a> |
| 26. | Amoebiasis (hsa05146)                                                 | 0.0002596306 | 27 | <a href="#">see genes</a> | 4 | <a href="#">details</a> |
| 27. | B cell receptor signaling pathway (hsa04662)                          | 0.0003168009 | 31 | <a href="#">see genes</a> | 6 | <a href="#">details</a> |
| 28. | Vasopressin-regulated water reabsorption (hsa04962)                   | 0.0008398865 | 11 | <a href="#">see genes</a> | 3 | <a href="#">details</a> |
| 29. | Acute myeloid leukemia (hsa05221)                                     | 0.0009800771 | 25 | <a href="#">see genes</a> | 7 | <a href="#">details</a> |
| 30. | Pancreatic cancer (hsa05212)                                          | 0.0009871219 | 30 | <a href="#">see genes</a> | 5 | <a href="#">details</a> |
| 31. | Basal cell carcinoma (hsa05217)                                       | 0.001585498  | 27 | <a href="#">see genes</a> | 8 | <a href="#">details</a> |
| 32. | Glioma (hsa05214)                                                     | 0.001906011  | 23 | <a href="#">see genes</a> | 7 | <a href="#">details</a> |
| 33. | mRNA surveillance pathway (hsa03015)                                  | 0.004174632  | 37 | <a href="#">see genes</a> | 2 | <a href="#">details</a> |
| 34. | Small cell lung cancer (hsa05222)                                     | 0.00442103   | 37 | <a href="#">see genes</a> | 8 | <a href="#">details</a> |
| 35. | Endocrine and other factor-regulated calcium reabsorption (hsa04961)  | 0.00529026   | 23 | <a href="#">see genes</a> | 6 | <a href="#">details</a> |
| 36. | Endometrial cancer (hsa05213)                                         | 0.005680885  | 18 | <a href="#">see genes</a> | 4 | <a href="#">details</a> |
| 37. | Calcium signaling pathway (hsa04020)                                  | 0.006057219  | 25 | <a href="#">see genes</a> | 3 | <a href="#">details</a> |
| 38. | Gap junction (hsa04540)                                               | 0.007639207  | 26 | <a href="#">see genes</a> | 4 | <a href="#">details</a> |
| 39. | Cytokine-cytokine receptor interaction (hsa04060)                     | 0.008086271  | 57 | <a href="#">see genes</a> | 7 | <a href="#">details</a> |
| 40. | T cell receptor signaling pathway (hsa04660)                          | 0.008173359  | 36 | <a href="#">see genes</a> | 6 | <a href="#">details</a> |
| 41. | Dopaminergic synapse (hsa04728)                                       | 0.009865667  | 47 | <a href="#">see genes</a> | 6 | <a href="#">details</a> |
| 42. | HIF-1 signaling pathway (hsa04066)                                    | 0.01043302   | 45 | <a href="#">see genes</a> | 6 | <a href="#">details</a> |
| 43. | Melanoma (hsa05218)                                                   | 0.01079892   | 32 | <a href="#">see genes</a> | 6 | <a href="#">details</a> |
| 44. | GnRH signaling pathway (hsa04912)                                     | 0.01086039   | 16 | <a href="#">see genes</a> | 5 | <a href="#">details</a> |
| 45. | Arrhythmogenic right ventricular cardiomyopathy (ARVC) (hsa05412)     | 0.01166638   | 27 | <a href="#">see genes</a> | 3 | <a href="#">details</a> |
| 46. | Glycosaminoglycan biosynthesis - heparan sulfate / heparin (hsa00534) | 0.01242264   | 11 | <a href="#">see genes</a> | 4 | <a href="#">details</a> |
| 47. | Non-small cell lung cancer (hsa05223)                                 | 0.01322575   | 19 | <a href="#">see genes</a> | 5 | <a href="#">details</a> |
| 48. | Hypertrophic cardiomyopathy (HCM) (hsa05410)                          | 0.01332318   | 30 | <a href="#">see genes</a> | 6 | <a href="#">details</a> |
| 49. | Aldosterone-regulated sodium reabsorption (hsa04960)                  | 0.01842879   | 19 | <a href="#">see genes</a> | 6 | <a href="#">details</a> |
| 50. | Fc gamma R-mediated phagocytosis (hsa04666)                           | 0.01901429   | 28 | <a href="#">see genes</a> | 7 | <a href="#">details</a> |
| 51. | mTOR signaling pathway (hsa04150)                                     | 0.01961992   | 24 | <a href="#">see genes</a> | 7 | <a href="#">details</a> |
| 52. | Gastric acid secretion (hsa04971)                                     | 0.02330469   | 27 | <a href="#">see genes</a> | 7 | <a href="#">details</a> |
| 53. | Circadian rhythm (hsa04710)                                           | 0.02455152   | 18 | <a href="#">see genes</a> | 3 | <a href="#">details</a> |
| 54. | Long-term potentiation (hsa04720)                                     | 0.04191049   | 30 | <a href="#">see genes</a> | 5 | <a href="#">details</a> |
| 55. | Hedgehog signaling pathway (hsa04340)                                 | 0.04343957   | 21 | <a href="#">see genes</a> | 5 | <a href="#">details</a> |
| 56. | Dilated cardiomyopathy (hsa05414)                                     | 0.04441793   | 14 | <a href="#">see genes</a> | 4 | <a href="#">details</a> |
| 57. | Protein processing in endoplasmic reticulum (hsa04141)                | 0.04525695   | 51 | <a href="#">see genes</a> | 2 | <a href="#">details</a> |
